# Supplementary material for: In situ-grown Co3S4sheet-functionalized metal–organic frameworkviasurface engineering as a HER catalyst in alkaline media
Source: Royal Society of Chemistry journal article supplement (doi:10.1039/d2ce01352e), 2022-01-01
Supplement: d2ce01352e2.pdf [file d2ce01352e2.pdf]

## Electronic Supplementary Information

### ***In situ*-grown Co<sub>3</sub>S<sub>4</sub> sheet-functionalized metal-organic framework via surface engineering as HER catalyst in alkaline media**

Kun Woo Park <sup>a</sup>, So Yeon Lee <sup>a</sup>, Juyoung Moon <sup>b</sup>, Hyun Ji An <sup>a</sup>, Dong Hyun Kim <sup>a</sup>,  
Chang Soo Lee <sup>c\*</sup>, and Jung Tae Park <sup>a\*</sup>

*<sup>a</sup> Department of Chemical Engineering, Konkuk University,*

*120 Neungdong-ro, Gwangjin-gu, Seoul 05029, Republic of Korea*

*<sup>b</sup> Department of Chemical and Biomolecular Engineering, Yonsei University,*

*50 Yonseu-ro, Seodaemun-gu, Seoul 03722, Republic of Korea*

*<sup>c</sup> Department of Polymer Science and Engineering, Kumoh National Institute of Tecnlogy,*

*61 Daehak-ro, Gumi, Gyeongbuk 39177, Republic of Korea*

\* To whom correspondence should be addressed.

E-mail: cslee21@Kumoh.ac.kr (C. S. Lee) or jtpark25@konkuk.ac.kr (J.T. Park)

**Number of Pages: 21**

**Number of Figures: 13**

**Number of Tables: 4**

**Number of Video: 1**

## Table of Contents

|                                                                                                                                                                                                                                                                                                                                                     |     |
|-----------------------------------------------------------------------------------------------------------------------------------------------------------------------------------------------------------------------------------------------------------------------------------------------------------------------------------------------------|-----|
| <b>Table S1.</b> List of Abbreviations .....                                                                                                                                                                                                                                                                                                        | S4  |
| <b>Figure S1.</b> (a) XRD patterns and (b) FT-IR spectra of Co MOF, U-MOF, and P-Co MOF.....                                                                                                                                                                                                                                                        | S5  |
| <b>Figure S2.</b> TGA curves of P-Co MOF, and P-Co MOF/Co <sub>3</sub> S <sub>4</sub> sheet in N <sub>2</sub> atmosphere .....                                                                                                                                                                                                                      | S6  |
| <b>Figure S3.</b> FE-SEM images of the samples: (a, b) high and low magnification images of Co MOF, (c, d) high and low magnification images of U-MOF, (e, f) high and low magnification images of Co MOF/Co <sub>3</sub> S <sub>4</sub> sheet, and (g, h) high and low magnification images of U-Co MOF/Co <sub>3</sub> S <sub>4</sub> sheet ..... | S7  |
| <b>Figure S4.</b> (a) SEM-EDS elemental mapping scan area, (b) C, and (c) Co elemental maps of P-Co MOF .....                                                                                                                                                                                                                                       | S8  |
| <b>Figure S5.</b> (a) SEM-EDS elemental mapping scan area, (b) C, (c) Co, and (d) S elemental maps of P-Co MOF/Co <sub>3</sub> S <sub>4</sub> sheet.....                                                                                                                                                                                            | S9  |
| <b>Figure S6.</b> Photograph image measuring pH of 1M KOH electrolyte.....                                                                                                                                                                                                                                                                          | S10 |
| <b>Video S1.</b> The P-Co MOF/Co <sub>3</sub> S <sub>4</sub> sheet electrode for HER in alkaline media.....                                                                                                                                                                                                                                         | S11 |
| <b>Table S2.</b> XPS atomic percentage analysis based on the survey spectra .....                                                                                                                                                                                                                                                                   | S12 |
| <b>Table S3.</b> Electrochemical properties of Co MOF/Co <sub>3</sub> S <sub>4</sub> sheet <i>via</i> surface engineering.....                                                                                                                                                                                                                      | S13 |
| <b>Figure S7.</b> iR-corrected HER polarization curves of Ni-foam and Pt/C on Nickel foam .....                                                                                                                                                                                                                                                     | S14 |
| <b>Figure S8.</b> Equivalent circuit of HER devices .....                                                                                                                                                                                                                                                                                           | S15 |
| <b>Figure S9.</b> Hydrogen evolution reaction (HER) mechanism under alkaline electrolyte.....                                                                                                                                                                                                                                                       | S16 |
| <b>Figure S10.</b> Cyclic voltammograms of (a) Co MOF, (b) U-Co MOF, (c) P-Co MOF, (d) Co MOF/Co <sub>3</sub> S <sub>4</sub> sheet, (e) U-Co MOF/Co <sub>3</sub> S <sub>4</sub> sheet, and (f) P-Co MOF/Co <sub>3</sub> S <sub>4</sub> sheet.....                                                                                                   | S17 |
| <b>Figure S11.</b> Chronopotentiometric curve of the P-Co MOF/Co <sub>3</sub> S <sub>4</sub> sheet with constant current density of -10 mA cm <sup>-2</sup> .....                                                                                                                                                                                   | S18 |
| <b>Figure S12.</b> SEM image of P-Co MOF/Co <sub>3</sub> S <sub>4</sub> sheet after long-term HER operation .....                                                                                                                                                                                                                                   | S19 |
| <b>Figure S13.</b> XRD pattern of P-Co MOF/Co <sub>3</sub> S <sub>4</sub> sheet after long-term HER operation.....                                                                                                                                                                                                                                  | S20 |

**Table S4.** Comparison of electrocatalysts for hydrogen evolution reaction reported in the literatures  
.....S21

## 1. Supplementary Results

**Table S1.** List of Abbreviations.

| Abbreviations                                 | Full form                                                                        |
|-----------------------------------------------|----------------------------------------------------------------------------------|
| Co MOF                                        | Cobalt Metal organic framework                                                   |
| U-Co MOF                                      | Urea-Cobalt Metal organic framework                                              |
| P-Co MOF                                      | PVP-Cobalt Metal organic framework                                               |
| Co MOF/Co <sub>3</sub> S <sub>4</sub> sheet   | Cobalt Metal organic framework derived Co <sub>3</sub> S <sub>4</sub> sheet      |
| U-Co MOF/Co <sub>3</sub> S <sub>4</sub> sheet | Urea-Cobalt Metal organic framework derived Co <sub>3</sub> S <sub>4</sub> sheet |
| P-Co MOF/Co <sub>3</sub> S <sub>4</sub> sheet | PVP-Cobalt Metal organic framework derived Co <sub>3</sub> S <sub>4</sub> sheet  |

**Figure S1.** (a) XRD patterns and (b) FT-IR spectra of Co MOF, U-MOF, and P-Co MOF.

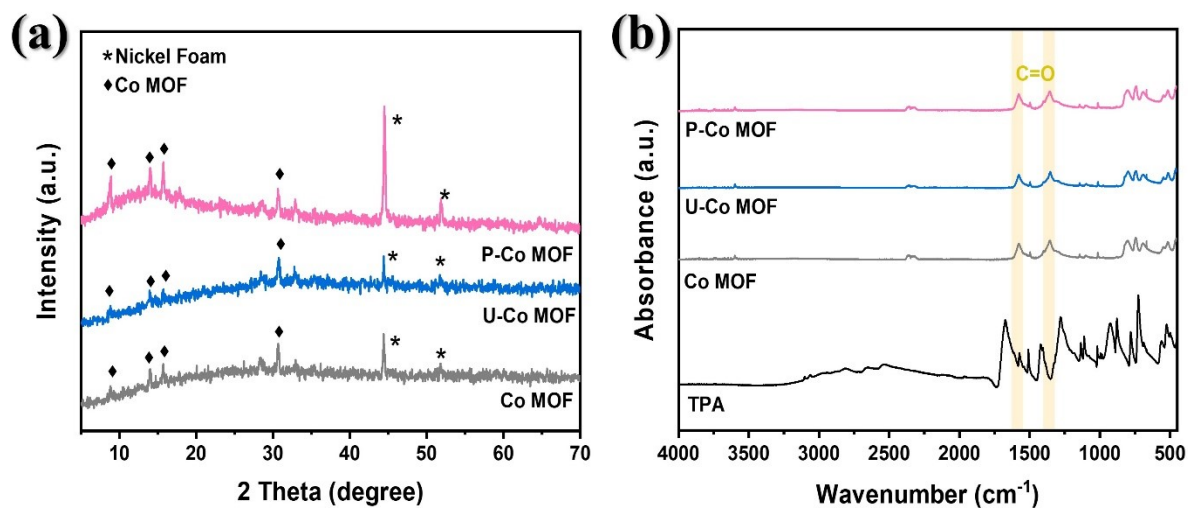

**Figure S2.** TGA curves of P-Co MOF, and P-Co MOF/Co<sub>3</sub>S<sub>4</sub> sheet in N<sub>2</sub> atmosphere.

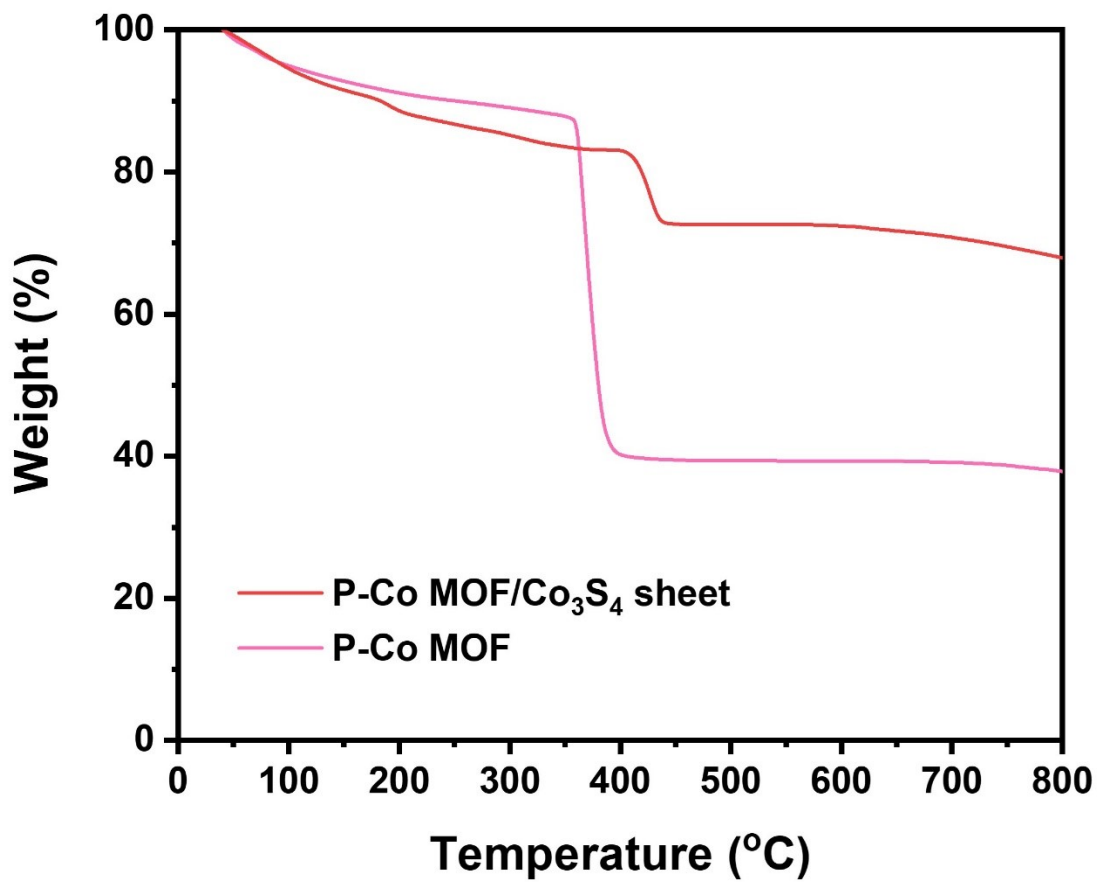

**Figure S3.** FE-SEM images of the samples: (a, b) high and low magnification images of Co MOF, (c, d) high and low magnification images of U-MOF, (e, f) high and low magnification images of Co MOF/Co<sub>3</sub>S<sub>4</sub> sheet, and (g, h) high and low magnification images of U-Co MOF/Co<sub>3</sub>S<sub>4</sub> sheet.

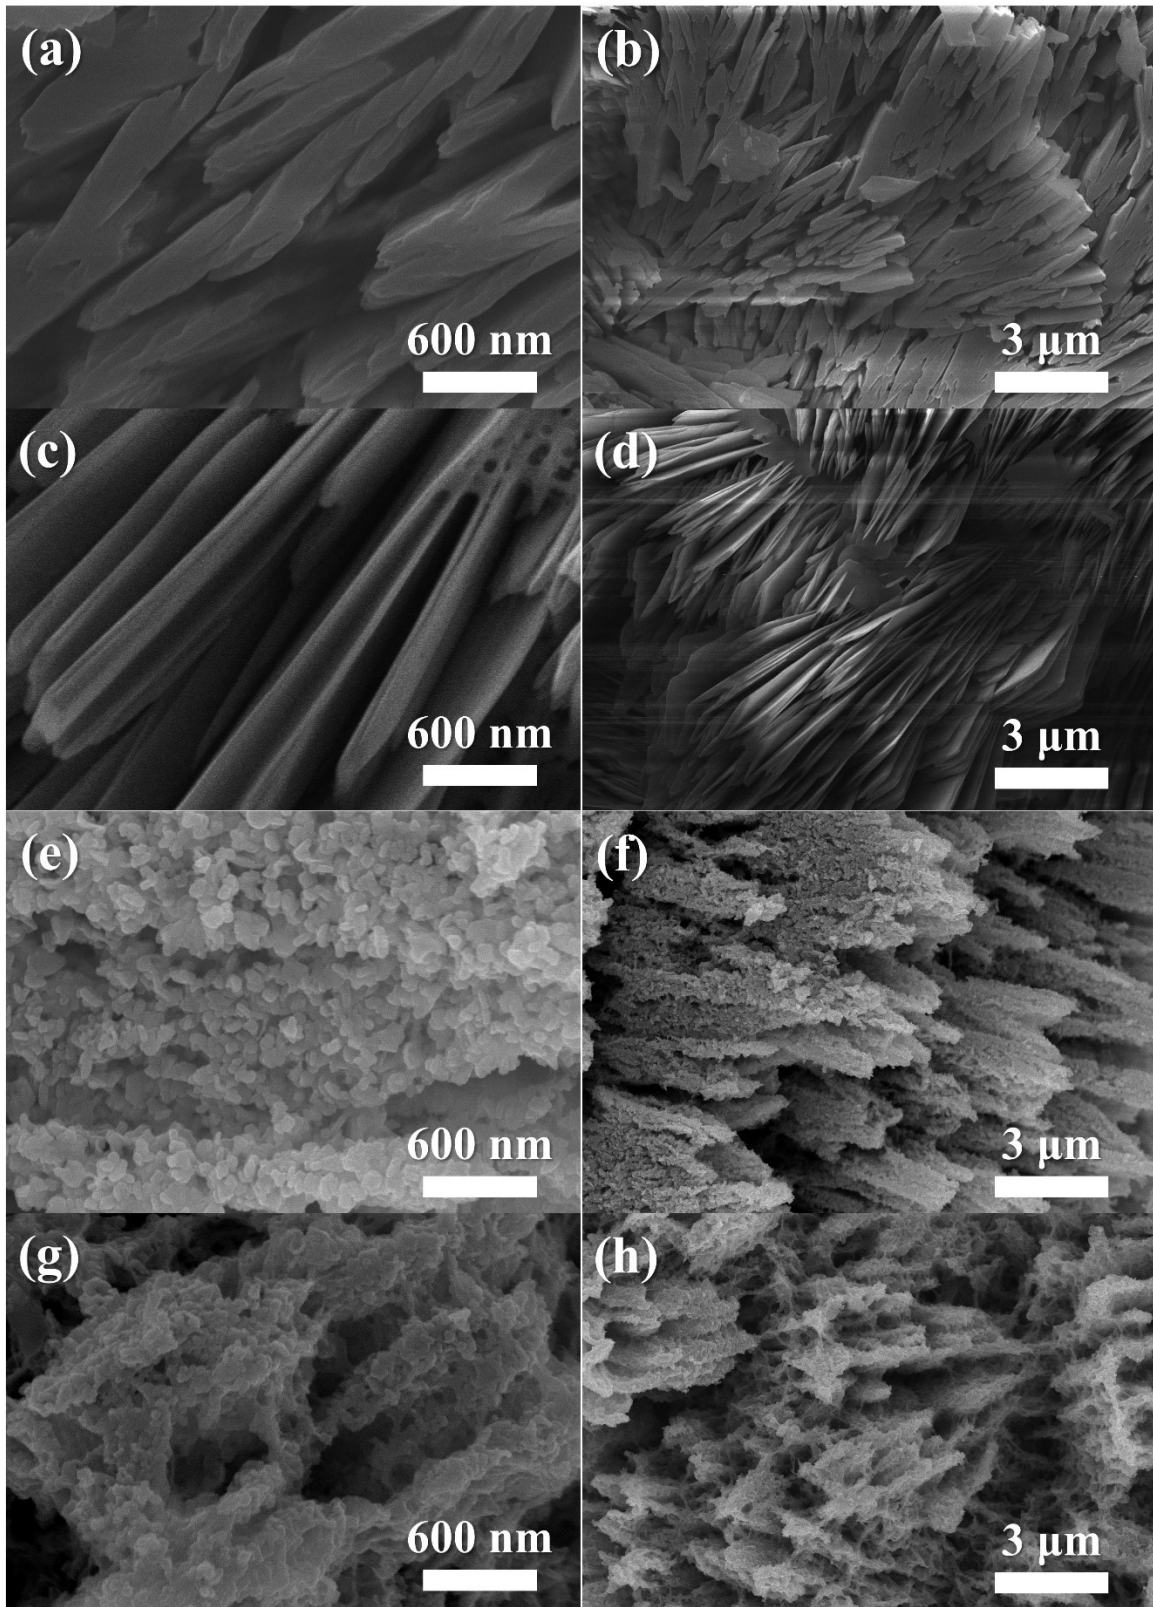

**Figure S4.** (a) SEM-EDS elemental mapping scan area, (b) C, and (c) Co elemental maps of P-Co MOF.

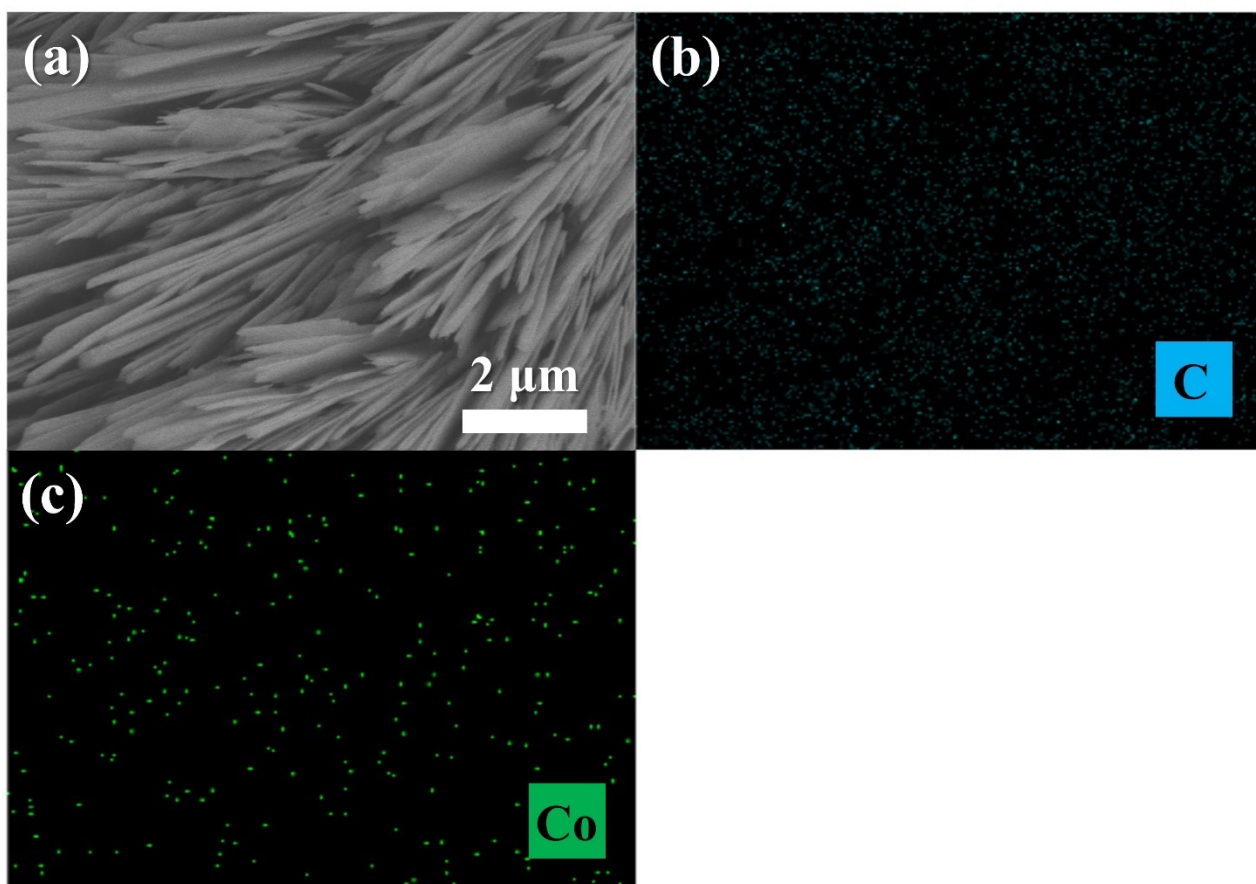



**Figure S5.** (a) SEM-EDS elemental mapping scan area, (b) C, (c) Co, and (d) S elemental maps of P-Co MOF/Co<sub>3</sub>S<sub>4</sub> sheet.

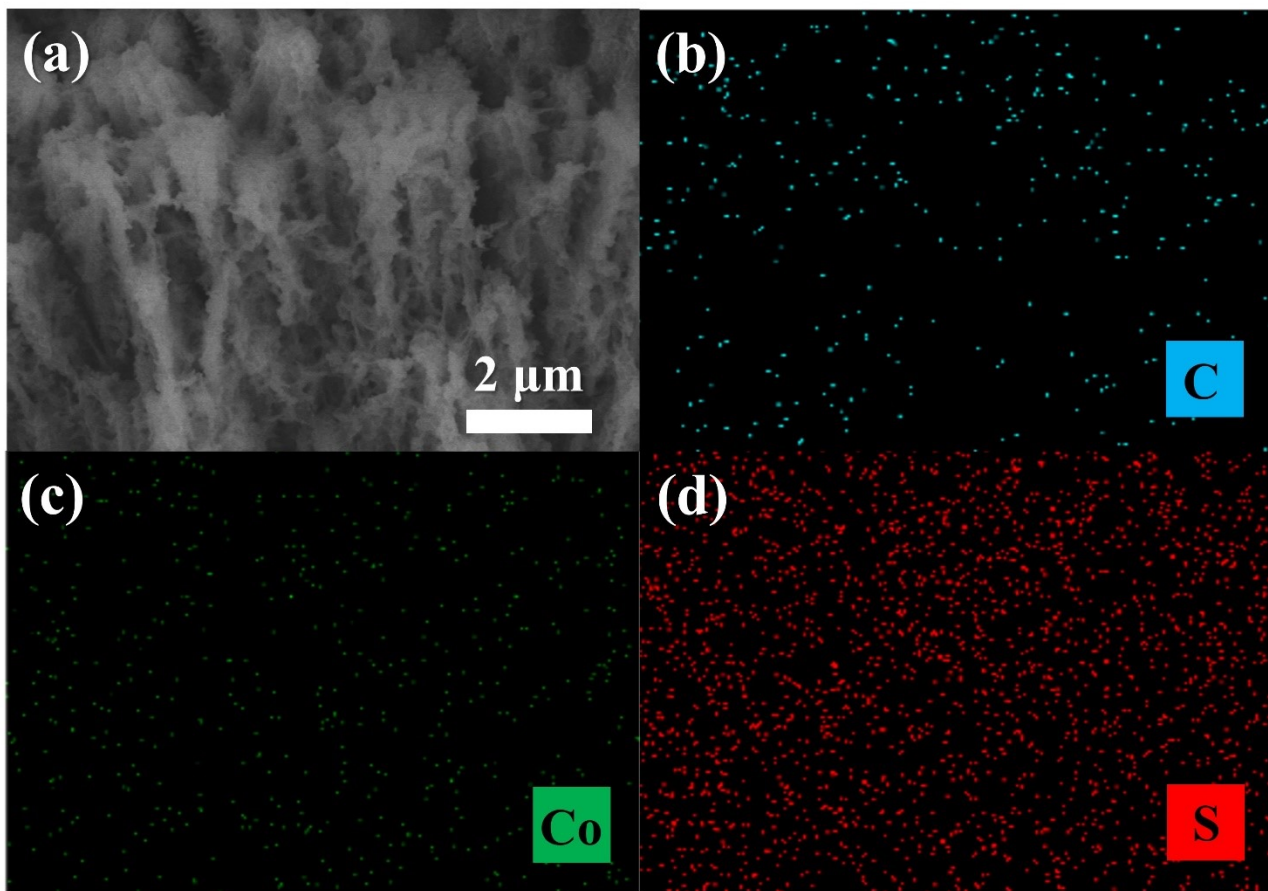

**Figure S6.** Photograph image measuring pH of 1M KOH electrolyte.

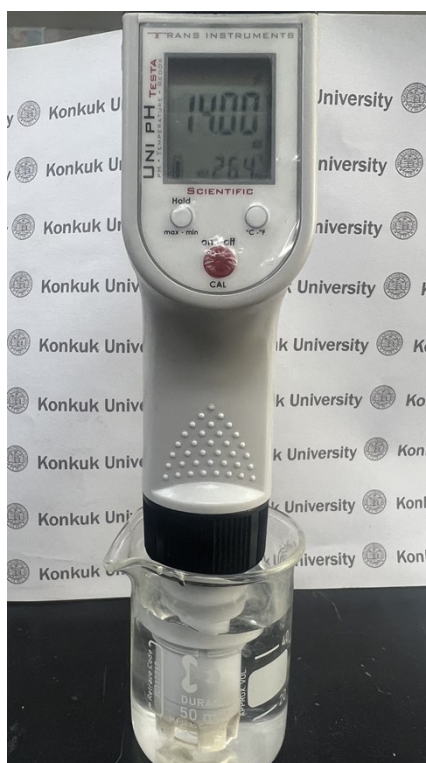

**Video S1.** The P-Co MOF/Co<sub>3</sub>S<sub>4</sub> sheet electrode for HER in alkaline media.

Please find attached the video file.

**Table S2.** XPS atomic percentage analysis based on the survey spectra.

| Electrocatalyst                               | C     | O     | S    | Co    |
|-----------------------------------------------|-------|-------|------|-------|
| P-Co MOF                                      | 59.40 | 33.43 | -    | 7.18  |
| P-Co MOF/Co <sub>3</sub> S <sub>4</sub> sheet | 22.02 | 53.85 | 7.97 | 16.15 |

**Table S3.** Electrochemical properties of Co MOF/Co<sub>3</sub>S<sub>4</sub> sheet *via* surface engineering.

| Electrocatalyst                               | $\eta$ , Overpotential@10 mA/cm <sup>2</sup><br>(mV) | Tafel slope<br>(mV/dec) | C <sub>dl</sub><br>(mF/cm <sup>2</sup> ) |
|-----------------------------------------------|------------------------------------------------------|-------------------------|------------------------------------------|
| Co MOF                                        | 212.8                                                | 129                     | 10.22                                    |
| U-Co MOF                                      | 208.4                                                | 108                     | 17.04                                    |
| P-Co MOF                                      | 201.6                                                | 109                     | 22.96                                    |
| Co MOF/Co <sub>3</sub> S <sub>4</sub> sheet   | 154.6                                                | 117                     | 45.5                                     |
| U-Co MOF/Co <sub>3</sub> S <sub>4</sub> sheet | 136.2                                                | 96                      | 46.4                                     |
| P-Co MOF/Co <sub>3</sub> S <sub>4</sub> sheet | 117.9                                                | 96                      | 57.9                                     |

Figure S7. iR-corrected HER polarization curves of Ni-foam and Pt/C on Nickel foam.

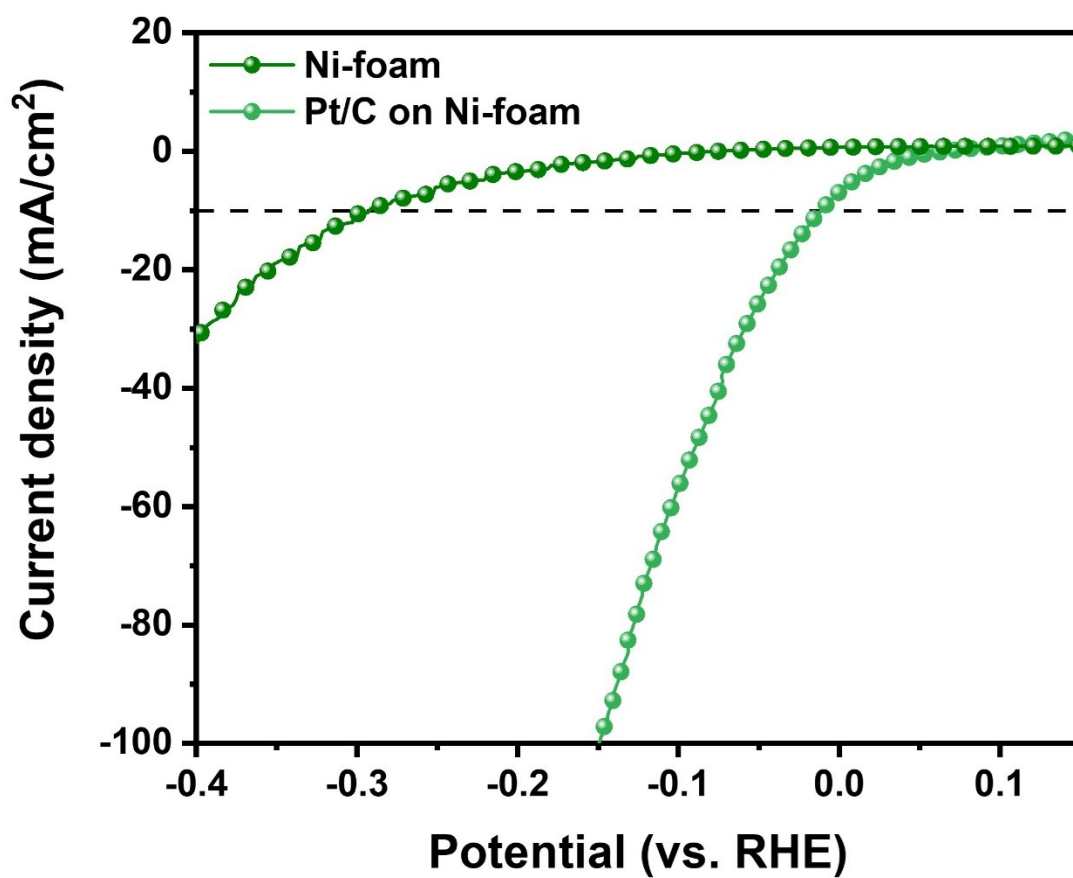

**Figure S8.** Equivalent circuit of HER devices.

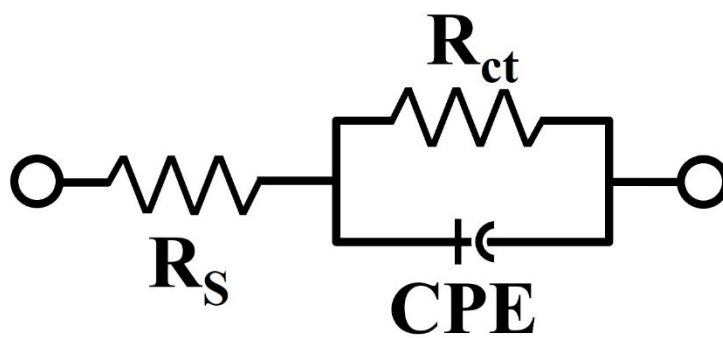

**Figure S9.** Hydrogen evolution reaction (HER) mechanism under alkaline electrolyte.

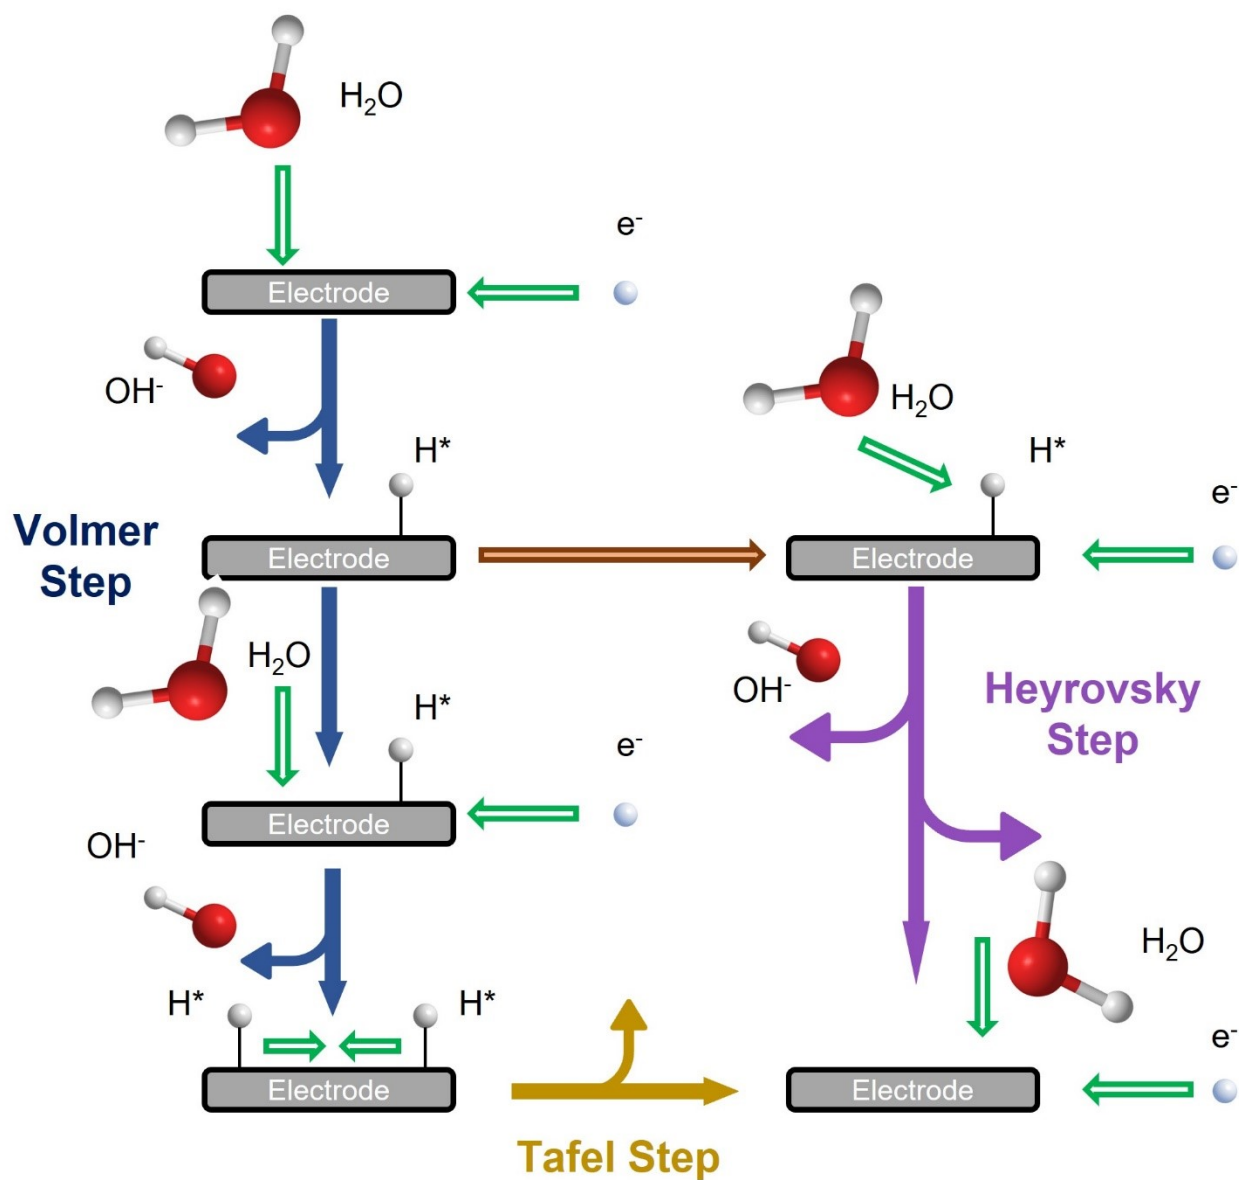



**Figure S10.** Cyclic voltammograms of (a) Co MOF, (b) U-Co MOF, (c) P-Co MOF, (d) Co MOF/Co<sub>3</sub>S<sub>4</sub> sheet, (e) U-Co MOF/Co<sub>3</sub>S<sub>4</sub> sheet, and (f) P-Co MOF/Co<sub>3</sub>S<sub>4</sub> sheet.

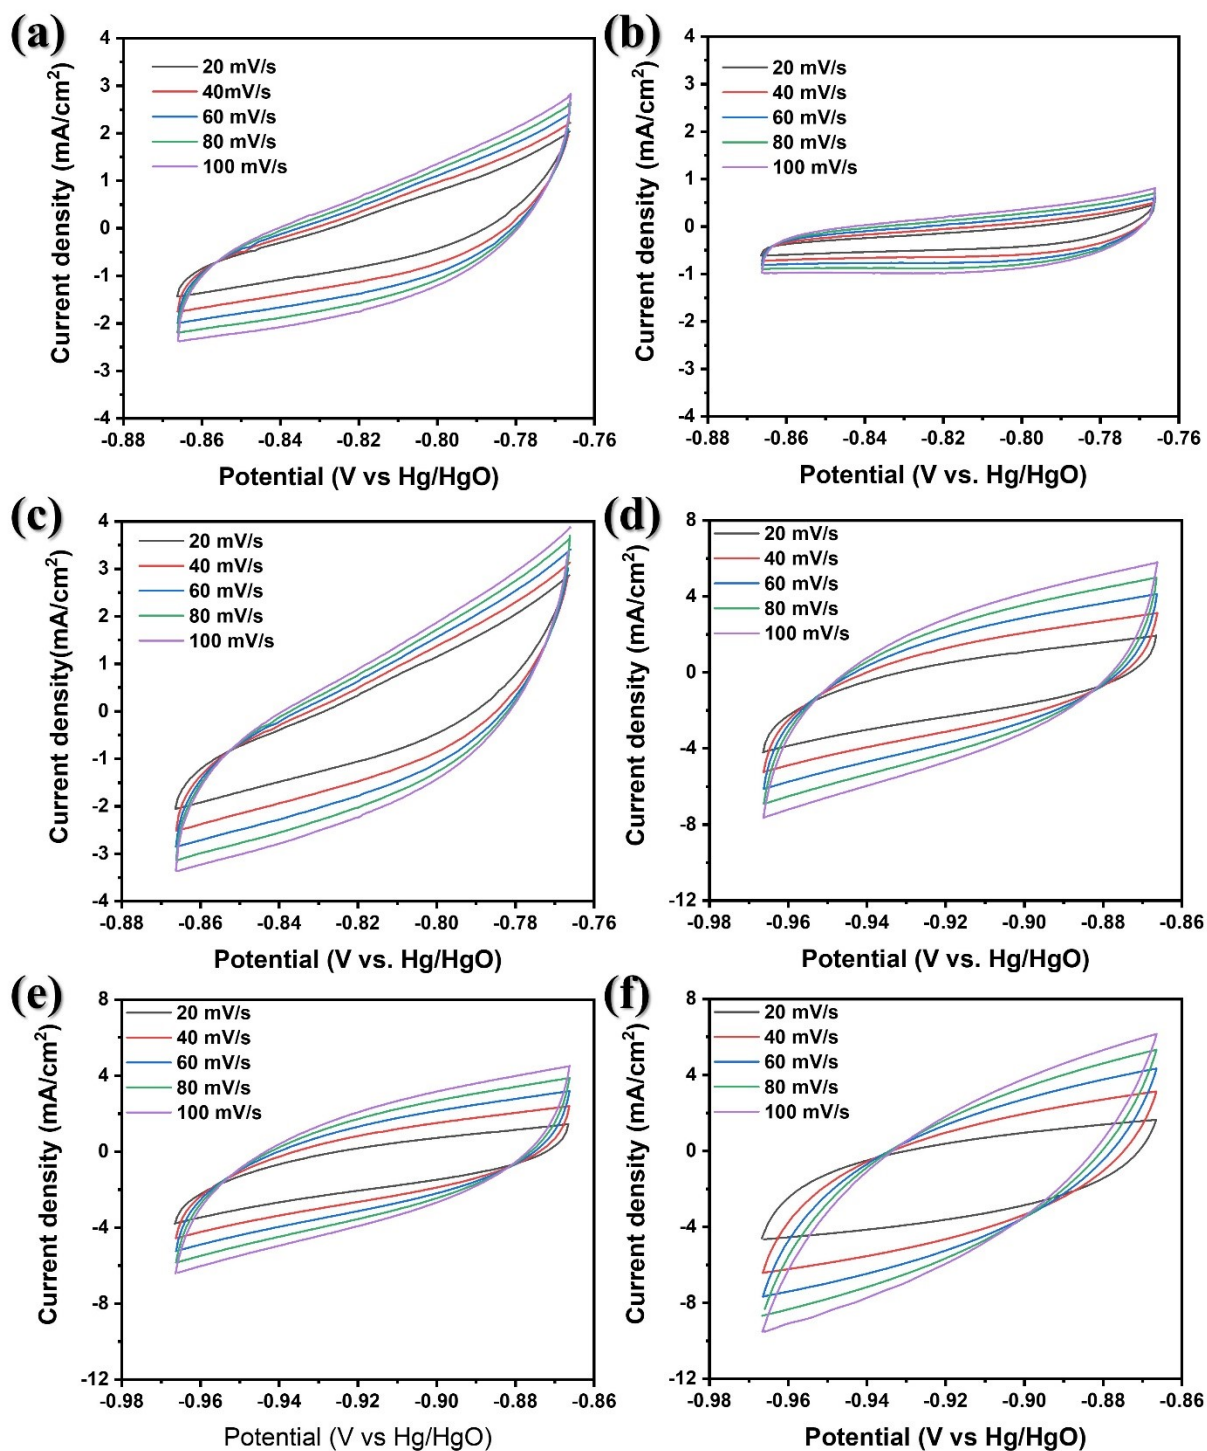

**Figure S11.** Chronopotentiometric curve of the P-Co MOF/Co<sub>3</sub>S<sub>4</sub> sheet with constant current density of -10 mA cm<sup>-2</sup>.

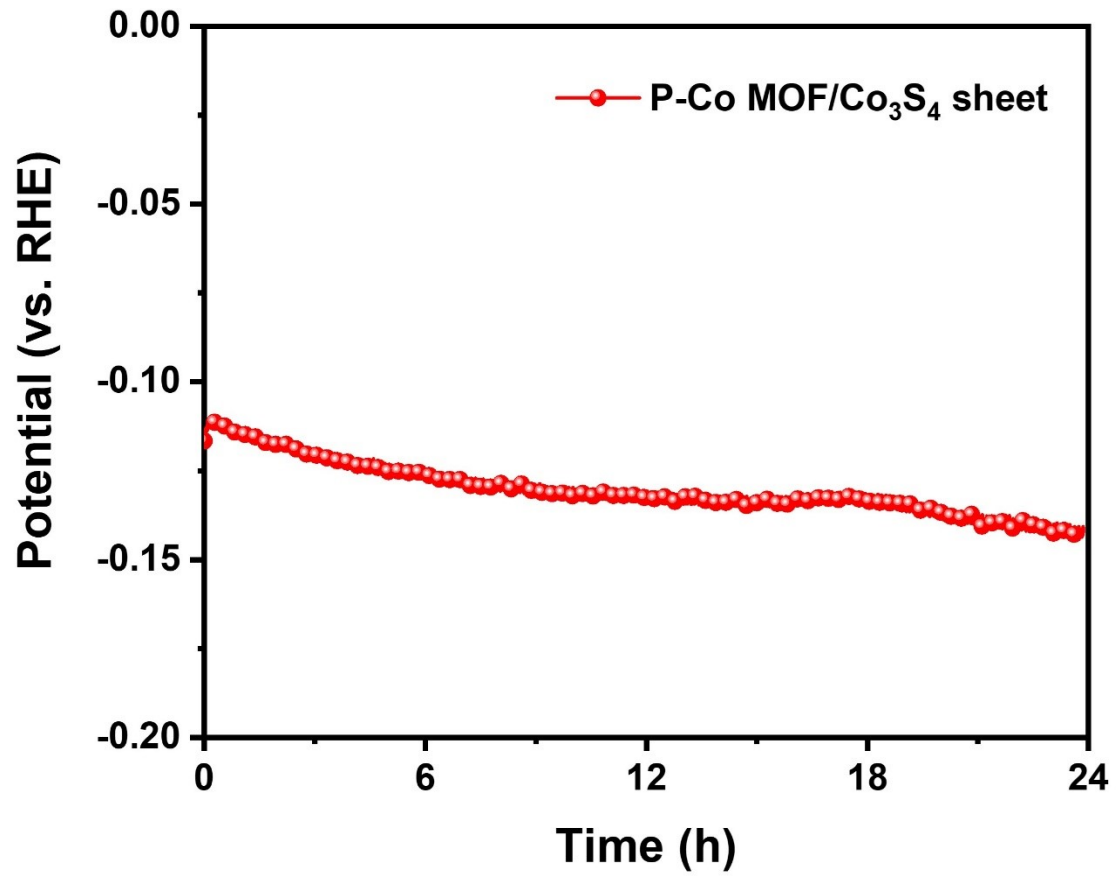

**Figure S12.** SEM image of P-Co MOF/Co<sub>3</sub>S<sub>4</sub> sheet after long-term HER operation.

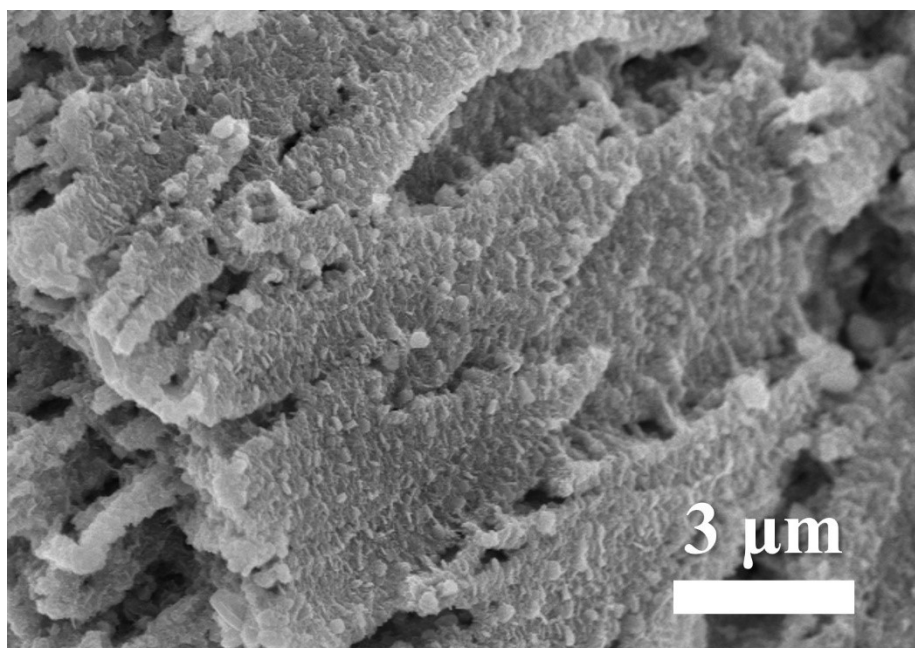

**Figure S13.** XRD pattern of P-Co MOF/Co<sub>3</sub>S<sub>4</sub> sheet after long-term HER operation.

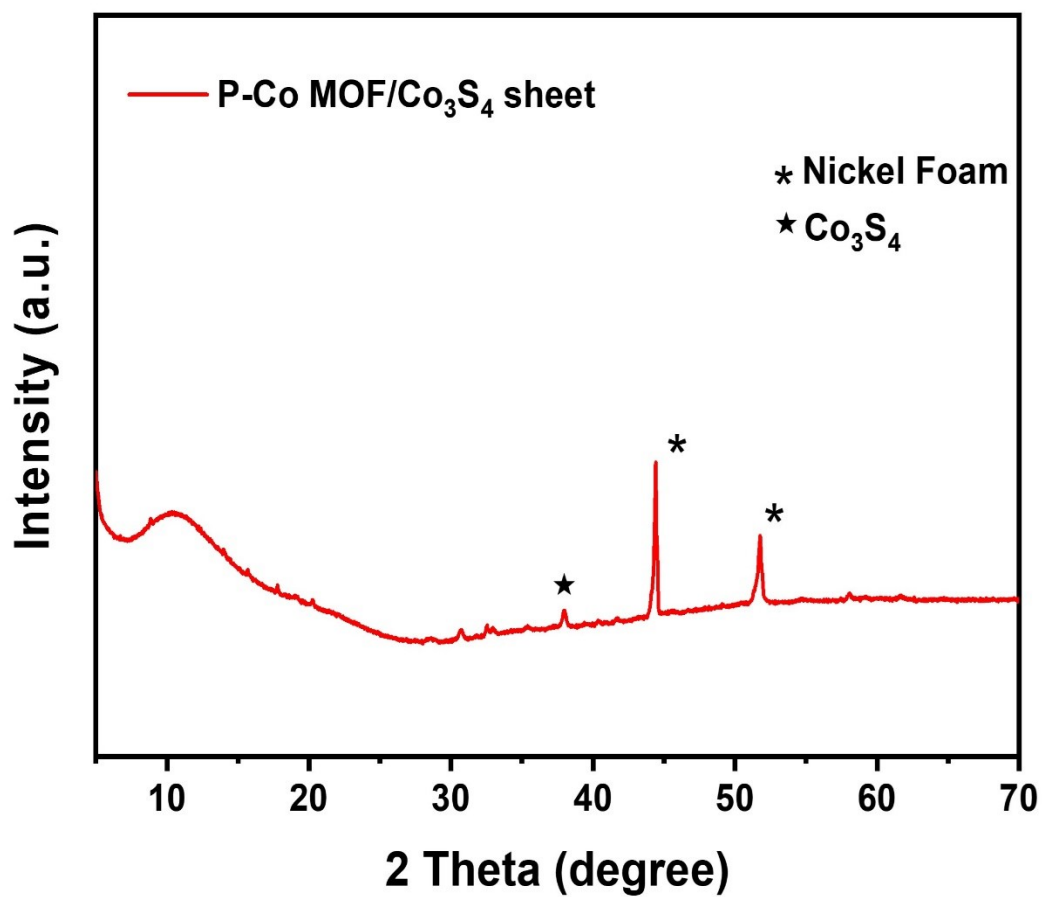

**Table S4.** Comparison of electrocatalysts for hydrogen evolution reaction reported in the literatures.

| Electrocatalyst                                                                                           | Synthesis method | Electrolyte | $\eta$ , Overpotential@-<br>10 mA/cm <sup>2</sup><br>(mV) | Tafel<br>slope<br>(mV/dec) | Reference |
|-----------------------------------------------------------------------------------------------------------|------------------|-------------|-----------------------------------------------------------|----------------------------|-----------|
| P-Co MOF/Co <sub>3</sub> S <sub>4</sub><br>sheet                                                          | Hydrothermal     | 1 M KOH     | 117.9                                                     | 96                         | This work |
| Co <sub>0.37</sub> S <sub>0.38</sub> P <sub>0.02</sub><br>NSs                                             | Hydrothermal     | 1 M KOH     | 218                                                       | 103                        | [61]      |
| Co <sub>3</sub> S <sub>4</sub> /MoS <sub>2</sub> NR                                                       | Hydrothermal     | 1 M KOH     | 116                                                       | 59                         | [62]      |
| Ni-Co sulfide/NF                                                                                          | Hydrothermal     | 1 M KOH     | 190                                                       | 147                        | [63]      |
| Cu-<br>Ni <sub>3</sub> S <sub>2</sub> /Co <sub>3</sub> S <sub>4</sub> /NF                                 | Hydrothermal     | 1 M KOH     | 176                                                       | 50.4                       | [64]      |
| Co <sub>3</sub> S <sub>4</sub> @Mo-<br>Co <sub>3</sub> S <sub>4</sub> -Ni <sub>3</sub> S <sub>2</sub> /NF | Hydrothermal     | 1 M KOH     | 116                                                       | 97                         | [65]      |
| MILN-based<br>Co <sub>3</sub> S <sub>4</sub> /MnS <sub>2</sub>                                            | Hydrothermal     | 1 M KOH     | 132                                                       | 150                        | [66]      |
| Co <sub>0.5</sub> Mo <sub>0.5</sub> S <sub>x</sub> +<br>XC72R                                             | Hydrothermal     | 1 M KOH     | 131                                                       | 75                         | [67]      |
| Co <sub>9</sub> S <sub>8</sub> /WS <sub>2</sub><br>nanobelt                                               | Hydrothermal     | 1 M KOH     | 138                                                       | 80.2                       | [68]      |
| CoMoS@CNF                                                                                                 | Hydrothermal     | 1 M KOH     | 105                                                       | 152.8                      | [69]      |
| NiS <sub>2</sub> /MoS <sub>2</sub> @GNS                                                                   | Hydrothermal     | 1 M KOH     | 130                                                       | 40                         | [70]      |
